# Supplementary material
Source: PubMed Central journal article supplement (PMC5511240)
Supplement: onc201737x1.pdf [file onc201737x1.pdf]

A

Significantly altered metabolic pathways

| Pathway maps                                 | p-values | Ratios<br>(altered gene/total genes) |
|----------------------------------------------|----------|--------------------------------------|
| Oxidative phosphorylation                    | 1.210E-6 | 10/105                               |
| Folic acid metabolism                        | 6.858E-5 | 6/53                                 |
| Histidine-glutamate<br>-glutamine metabolism | 2.648E-4 | 7/95                                 |

B

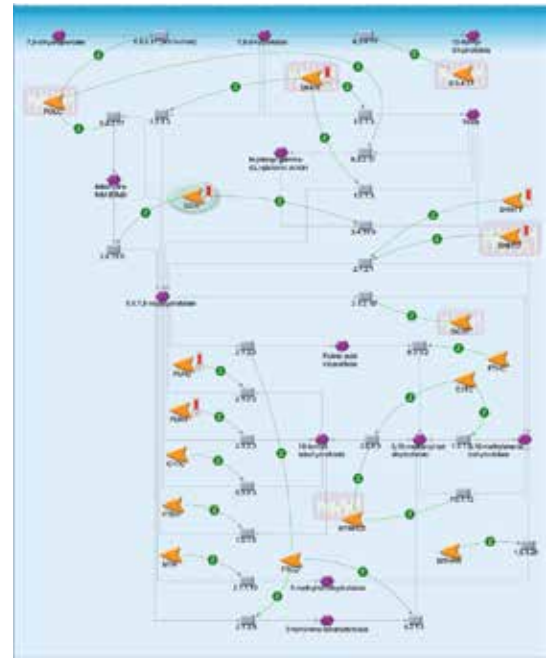

C

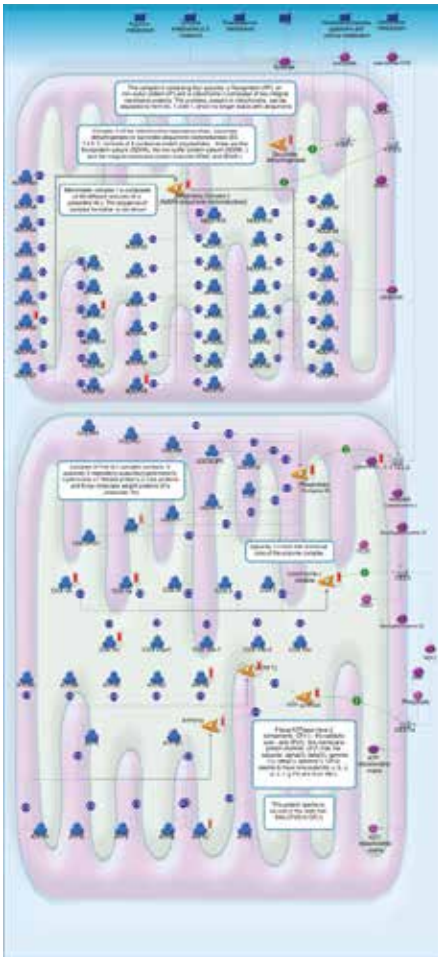

D

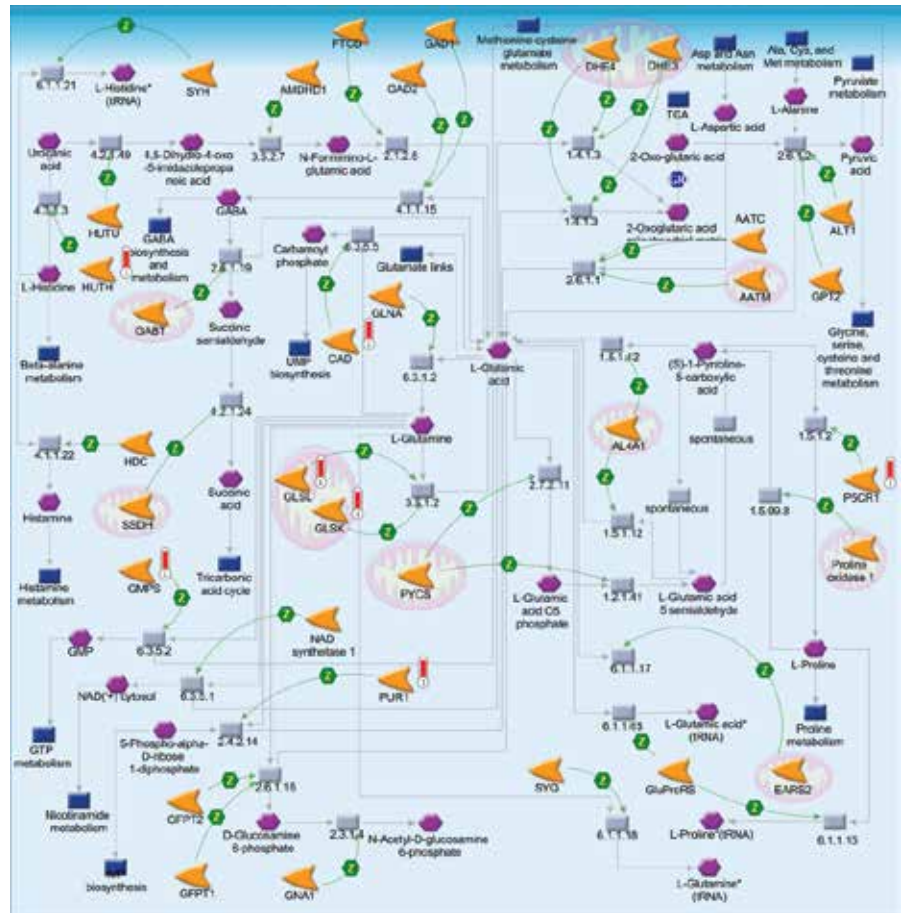

*ATIC (PUR9)*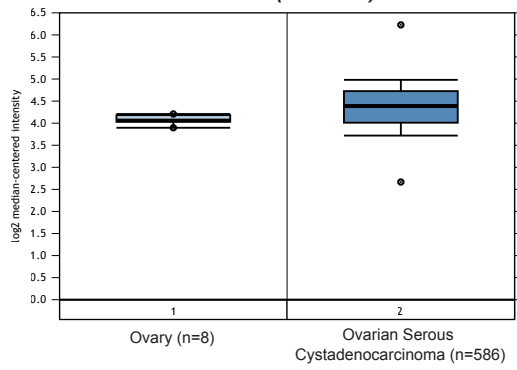

*ATIC* Fold change = +1.227  
p-value = 8.49E-6

*DHFR*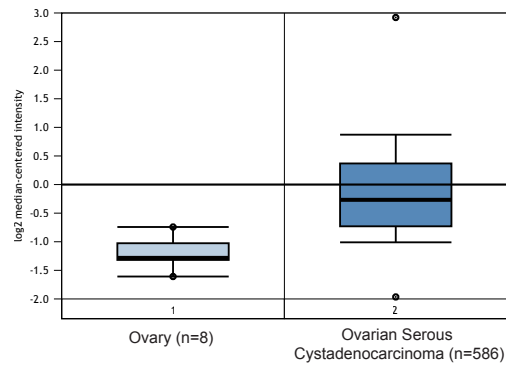

*DHFR* Fold change = +2.084  
p-value = 1.27E-6

*GART (PUR2)*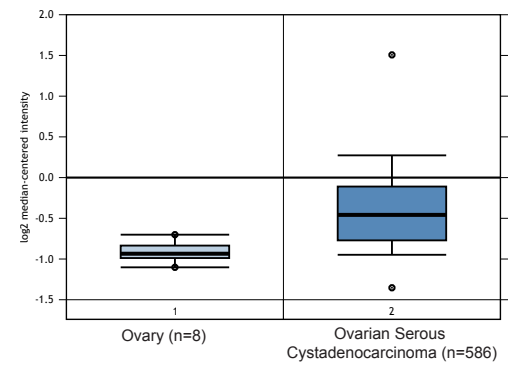

*GART* Fold change = +1.446  
p-value = 4.73E-7

*GGH*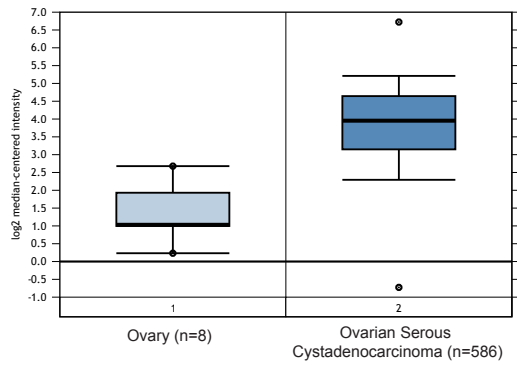

*GGH* Fold change = +6.21  
p-value = 1.03E-5

*SHMT1*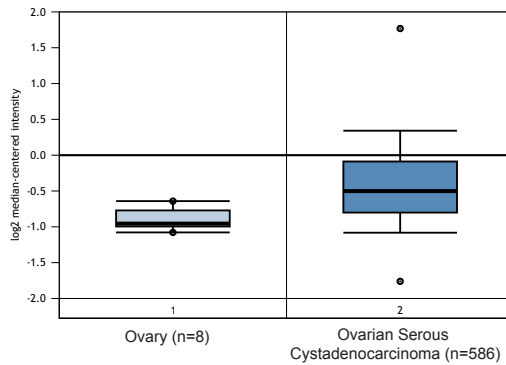

*SHMT1* Fold change = +1.41  
p-value = 2.26E-6

*SHMT2*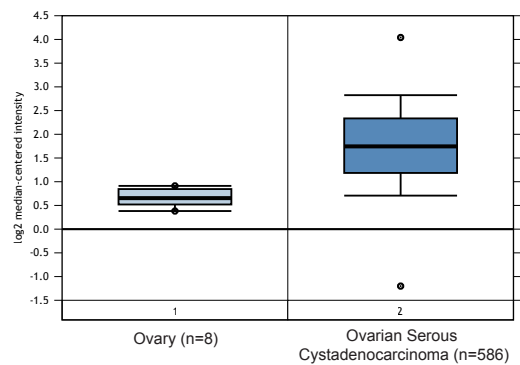

*SHMT2* Fold change = +2.163  
p-value = 1.13E-8

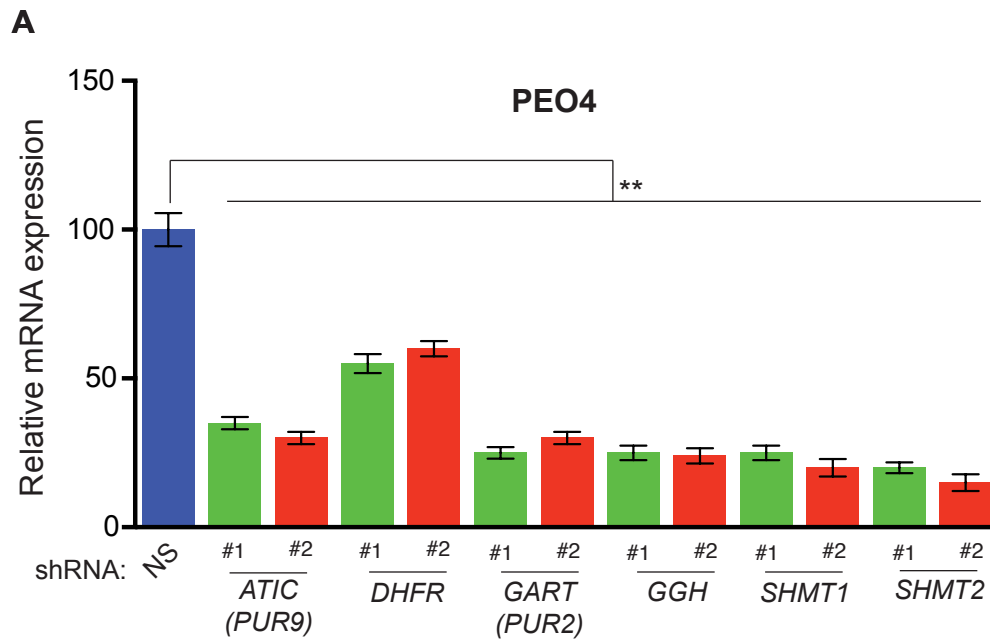**B**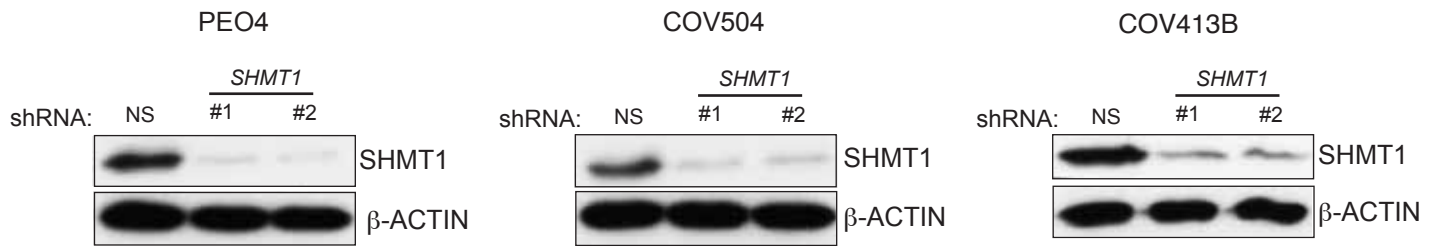

A

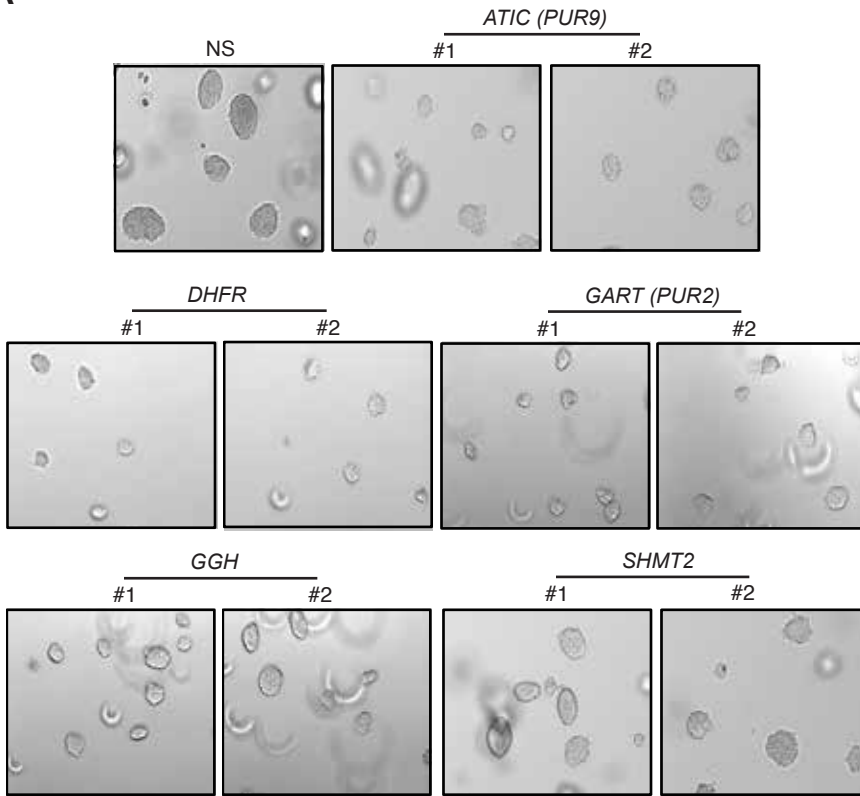

B

| Cell line | shRNA         | Colony number | Average Colony size |
|-----------|---------------|---------------|---------------------|
| PEO4      | NS            | 93±8.2        | 100±4.8             |
|           | ATIC (PUR9)#1 | 60±6          | 34.2±3.2            |
|           | ATIC (PUR9)#2 | 50±7.3        | 38.4±3              |
|           | DHFR#1        | 50±6.3        | 34.6±4.1            |
|           | DHFR#2        | 70±7.2        | 35.5±3.4            |
|           | GART (PUR2)#1 | 70±5.6        | 30.7±3.5            |
|           | GART (PUR2)#2 | 60±6.6        | 33.8±4.2            |
|           | GGH#1         | 90±11         | 53.8±3.8            |
|           | GGH#2         | 70±10         | 65.3±4.8            |
|           | SHMT2#1       | 80±9          | 92.3±4              |
|           | SHMT2#2       | 60±8          | 96.1±4.3            |

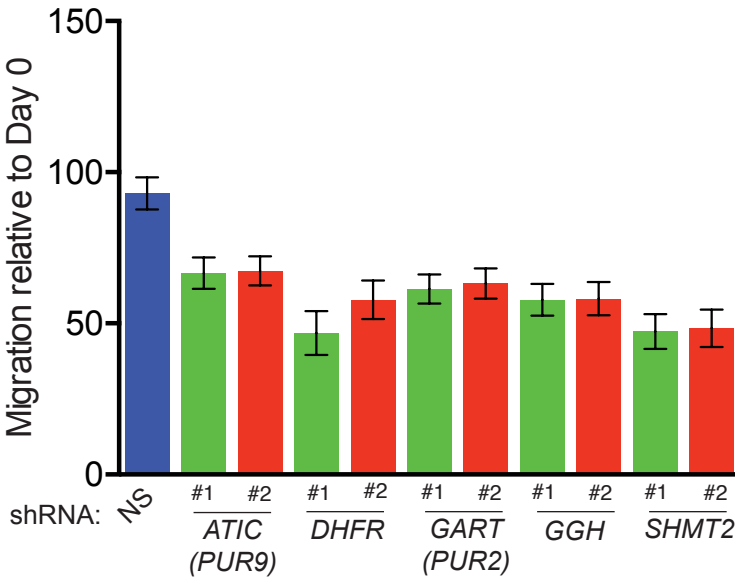

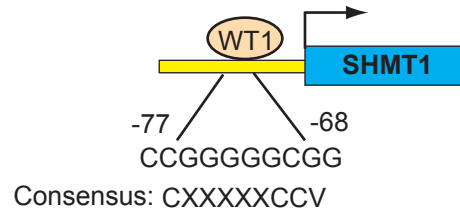

## Supplementary Figure Legends

**Supplementary Figure 1. Identification of key metabolic pathway alterations in ovarian cancer.** **A.** Ingenuity pathway analysis (IPA) identifies oxidative phosphorylation, folic acid metabolism, and histidine-glutamate-glutamine metabolism as three key metabolic pathways that were altered in ovarian cancer cells. The table lists p-values and the number of genes in each pathway in ratio with genes that are altered in indicated metabolic pathways. **B.** Folic acid metabolic pathway showing six genes marked with red stick image (**inset**) that are significantly upregulated in TCGA ovarian cancer datasets. **C.** Oxidative phosphorylation pathway showing 10 genes marked with red stick image (**inset**) that are significantly upregulated in TCGA ovarian cancer datasets. **D.** Histidine-glutamate-glutamine metabolic pathway showing seven genes marked with red stick image (**inset image**) that are significantly upregulated in TCGA ovarian cancer datasets.

**Supplementary Figure 2. Genes in folic acid metabolic pathway are upregulated in ovarian cancer cells.** TCGA ovarian cancer dataset analysis shows relative fold-upregulation and p-values for indicated genes.

**Supplementary Figure 3. Knockdown of genes of folic acid metabolic pathway in multiple ovarian cancer cell lines.** **A.** PEO4 cells expressing either control nonspecific (NS) shRNA or shRNA targeting the indicated mRNAs were analyzed for expression of indicated mRNAs by RT-qPCR. Expression level relative to that of cells expressing NS shRNA is shown. **B.** PEO4,

COV504, and COV413B cells expressing NS or *SHMT1* shRNAs were analyzed for SHMT1 and  $\beta$ -ACTIN expression by immunoblotting. Data are presented as mean  $\pm$  SEM; \*\*p<0.005.

**Supplementary Figure 4. Effect of knockdown of folic acid metabolic pathway genes on ovarian cancer growth.** PEO4 cells expressing either control nonspecific (NS) shRNA or shRNA targeting the indicated mRNAs were analyzed for the ability to grow in an anchorage-independent manner in a soft-agar assay. Representative soft-agar assay images (A) and colony number and size relative to those of cells expressing NS shRNA (B) are shown.

**Supplementary Figure 5. Effect of knockdown of folic acid metabolic pathway genes on ovarian cancer cell migration.** PEO4 expressing either a control nonspecific (NS) or indicated targeted shRNAs were analyzed for the ability to migrate in a wound-healing assay. Representative cell migration for indicated shRNAs at day 4 relative to day 0 is shown.

**Supplementary Figure 6. Schematic representation of transcription factor Wilms tumor 1 (WT1) binding site on *SHMT1* promoter.**



**Supplementary Table 1. List of 6 genes regulating folic acid metabolic shortlisted for functional validation in ovarian cancer samples**

| <b>Gene Symbol</b> | <b>Gene Name</b>                                                                                                           | <b>Functional Category</b> | <b>Fold upregulation in TCGA dataset</b> |
|--------------------|----------------------------------------------------------------------------------------------------------------------------|----------------------------|------------------------------------------|
| ATIC (PUR9)        | 5-aminoimidazole-4-carboxamide ribonucleotide formyltransferase/IMP cyclohydrolase                                         | Folic Acid Metabolism      | <b>+1.227</b><br>p-value=8.49E-6         |
| DHFR               | Dihydrofolate reductase                                                                                                    | Folic Acid Metabolism      | <b>+2.084</b><br>p-value=1.27E-6         |
| GART (PUR2)        | phosphoribosylglycinamide formyltransferase, phosphoribosylglycinamide synthetase, phosphoribosylaminoimidazole synthetase | Folic Acid Metabolism      | <b>+1.446</b><br>p-value=4.73E-7         |
| GGH                | Gamma-glutamyl hydrolase                                                                                                   | Folic Acid Metabolism      | <b>+6.21</b><br>p-value=1.03E-5          |
| SHMT1              | Serine Hydroxymethyltransferase 1                                                                                          | Folic Acid Metabolism      | <b>+1.41</b><br>p-value=2.26E-6          |
| SHMT2              | Serine Hydroxymethyltransferase 2                                                                                          | Folic Acid Metabolism      | <b>+2.163</b><br>p-value= 1.13E-8        |

**Supplementary Table 2. Fold change for significantly altered genes in PEO4 cells expressing *SHMT1* shRNAs compared to the cells expressing non-silencing shRNA**

| <b>Gene Symbol</b> | <b>Fold change <i>SHMT1</i> shRNA#1</b> | <b>Fold Change <i>SHMT1</i> shRNA#2</b> |
|--------------------|-----------------------------------------|-----------------------------------------|
| ADM                | -1.51119176                             | -1.36910868                             |
| ATOH8              | 1.32527115                              | 1.715921298                             |
| AVPI1              | -1.282157373                            | -1.512357676                            |
| BDNF               | -1.606796987                            | -1.338330091                            |
| BLACAT1            | -1.334442404                            | -1.331317824                            |
| C3orf14            | -1.483782624                            | -1.67738232                             |
| CAMK2N1            | -1.932333413                            | -1.825005487                            |
| CD163L1            | -1.400289792                            | -1.574268376                            |
| CD24               | -1.531860014                            | -1.997061865                            |
| CD24               | -1.531860014                            | -1.492119753                            |
| CFI                | -1.518543288                            | -1.365039684                            |
| CXCL8              | -1.342219044                            | -2.201465452                            |
| CXCL8              | -1.342219044                            | -2.164724636                            |
| DKAKD              | 1.475621422                             | 1.294620178                             |
| DEFB1              | -1.730575                               | -1.77585153                             |
| DHRS9              | -1.451458765                            | -1.563242937                            |
| FAM83D             | 1.382984166                             | 1.260764423                             |
| FGFR3              | 1.466252262                             | 1.372789166                             |
| FMOD               | 1.346585943                             | 1.357794286                             |
| GFRA2              | 3.237919393                             | 2.026628216                             |
| ICAM2              | -1.338111374                            | -1.379860057                            |
| IER3               | -1.903510432                            | -1.899100239                            |
| IL24               | -1.485749921                            | -1.703134679                            |
| IL6                | -1.528866418                            | -1.316266015                            |
| KANK4              | -1.51939388                             | -1.554746992                            |
| KANK4              | -1.51939388                             | -1.545027157                            |
| KRT17              | -1.385708821                            | -1.25350592                             |
| KRT81              | -1.811243849                            | -1.865098126                            |
| LEMD1              | -1.576916891                            | -1.398655882                            |
| MAL                | -2.606955795                            | -1.441467059                            |
| MGAT3              | -1.255031755                            | -1.546480376                            |
| MT1M               | -1.786099952                            | -1.507042657                            |
| NDN                | -1.273268363                            | -1.442652115                            |
| NT5E               | -1.491530971                            | -1.560153367                            |
| PBX3               | -1.370465743                            | -1.521449612                            |
| PDE4B              | -1.387581731                            | -2.273554584                            |
| PDE4B              | -1.387581731                            | -1.438673871                            |
| PHLDA1             | -1.391449138                            | -1.608509464                            |
| PTGES              | -1.600225599                            | -1.322914701                            |
| PXDN               | -1.311852644                            | -1.604810459                            |
| RARRES1            | -1.862862733                            | -2.006348736                            |
| RARRES1            | -1.862862733                            | -1.697142428                            |
| RASD1              | 1.724253894                             | 1.360291829                             |
| S100P              | -1.936451328                            | -1.878168746                            |
| SHMT1              | -1.726555704                            | -1.238954893                            |
| SHMT1              | -1.223038773                            | -1.025780892                            |

|        |              |              |
|--------|--------------|--------------|
| SLC2A3 | -2.620649702 | -1.389633758 |
| SRPX2  | -1.484815179 | -1.268622988 |
| SST    | -1.835290759 | -1.499521006 |
| TFAP2A | -2.367339503 | -1.826434342 |
| TFAP2A | -2.367339503 | -1.796460918 |
| UCP2   | 1.409043271  | 1.462641205  |
| UPP1   | -1.280808019 | -1.298120582 |

**Supplementary Table 3. Significantly altered biological pathways identified in PEO4 cells expressing *SHMT1* shRNAs compared to the cells expressing nonsilencing shRNA**

| S.No. | Enriched pathway map                                                                     | p-value   | FDR        | In data | Network objects from active data |
|-------|------------------------------------------------------------------------------------------|-----------|------------|---------|----------------------------------|
| 1     | Immune response HMGB1/TLR signaling pathway                                              | 1.339E-04 | 1.206E-02  | 3       | IL-6, IL-8, TIRAP (Mal)          |
| 2     | Immune response Bacterial infections in normal airway                                    | 3.373E-04 | 1.206E-02  | 3       | IL-6, IL-8, TIRAP (Mal)          |
| 3     | PDE4 regulation of cyto/chemokine expression in arthritis                                | 3.373E-04 | 1.206E-02  | 3       | PDE4, IL-6, IL-8                 |
| 4     | PDE4 regulation of cyto/chemokine expression in inflammatory skin diseases               | 3.582E-04 | 1.206E-02  | 3       | PDE4, IL-6, IL-8                 |
| 5     | Immune response_HSP60 and HSP70/ TLR signaling pathway                                   | 4.499E-04 | 1.206E-02  | 3       | IL-6, IL-8, TIRAP (Mal)          |
| 6     | Immune response_TLR2 and TLR4 signaling pathways                                         | 5.277E-04 | 1.206E-02  | 3       | IL-6, IL-8, TIRAP (Mal)          |
| 7     | Immune response_Role of PKR in stress-induced antiviral cell response                    | 5.277E-04 | 1.206E-02  | 3       | IL-6, IL-8, TIRAP (Mal)          |
| 8     | Multiple myeloma (general schema)                                                        | 1.140E-03 | 2.279E-02  | 2       | IL-6, FGFR3                      |
| 9     | Immune response_MIF-mediated glucocorticoid regulation                                   | 1.709E-03 | 3.038E-02  | 2       | IL-6, IL-8                       |
| 10    | Immune response_Role of HMGB1 in dendritic cell maturation and migration                 | 2.574E-03 | 4.025E-02  | 2       | IL-6, IL-8                       |
| 11    | Immune response_Antigen presentation by MHC class I                                      | 2.767E-03 | 4.025E-02  | 2       | CD8 alpha, CD8                   |
| 12    | Colorectal cancer (general schema)                                                       | 3.174E-03 | 4.231E-02  | 2       | IL-6, IL-8                       |
| 13    | Complement pathway disruption in thrombotic microangiopathy                              | 4.800E-03 | 4.604E-02  | 2       | IL-8, Factor I                   |
| 14    | Immune response_Role of integrins in NK cells cytotoxicity                               | 5.058E-03 | 4.604E-02  | 2       | IL-8, ICAM2                      |
| 15    | Substance P-mediated inflammation and pain in Sickle cell disease                        | 5.058E-03 | 4.604E-02  | 2       | IL-6, IL-8                       |
| 16    | Immune response_TSLP signalling                                                          | 5.322E-03 | 42.604E-02 | 2       | IL-6, IL-8                       |
| 17    | Immune response_MIF in innate immunity response                                          | 5.593E-03 | 4.604E-02  | 2       | IL-6, IL-8                       |
| 18    | Immune response_Substance P-stimulated expression of proinflammatory cytokines via MAPKs | 6.441E-03 | 4.604E-02  | 2       | IL-6, IL-8                       |
| 19    | Role of platelets in the initiation of in-stent restenosis                               | 6.441E-03 | 4.604E-02  | 2       | IL-8, ICAM2                      |
| 20    | Immune response_IL-1 signaling pathway                                                   | 6.736E-03 | 4.604E-02  | 2       | IL-6, IL-8                       |
| 21    | Immune response_PGE2 signaling in immune response                                        | 7.038E-03 | 4.604E-02  | 2       | PGES, IL-8                       |
| 22    | Immune response_Inhibitory action of Lipoxins on pro-inflammatory TNF-alpha              | 7.345E-03 | 4.604E-02  | 2       | IL-6, IL-8                       |

|    |                                                                                      |           |           |   |                |
|----|--------------------------------------------------------------------------------------|-----------|-----------|---|----------------|
|    | signaling                                                                            |           |           |   |                |
| 23 | Chemotaxis_CCR1 signaling                                                            | 7.977E-03 | 4.604E-02 | 2 | IL-6, IL-8     |
| 24 | Immune response_C3a signaling                                                        | 7.977E-03 | 4.604E-02 | 2 | IL-6, IL-8     |
| 25 | Immune response_Histamine H1 receptor signaling in immune response                   | 7.977E-03 | 4.604E-02 | 2 | IL-6, IL-8     |
| 26 | Immune response_TLR5, TLR7, TLR8 and TLR9 signaling pathways                         | 7.977E-03 | 4.604E-02 | 2 | IL-6, IL-8     |
| 27 | Role and regulation of Prostaglandin E2 in gastric cancer                            | 8.302E-03 | 4.604E-02 | 2 | PGES, IL-8     |
| 28 | Development_PEDF signaling                                                           | 8.302E-03 | 4.604E-02 | 2 | IL-6, BDNF     |
| 29 | Huntington's disease (general schema)                                                | 8.443E-03 | 4.604E-02 | 2 | BDNF           |
| 30 | Immune response_Histamine signaling in dendritic cells                               | 8.633E-03 | 4.604E-02 | 2 | IL-6, IL-8     |
| 31 | Inflammatory factors-induced expression of mucins in normal and asthmatic epithelium | 8.970E-03 | 4.630E-02 | 2 | IL-6, IL-8     |
| 32 | Immune response_Inhibitory PD-1 signaling in T cells                                 | 9.661E-03 | 4.684E-02 | 2 | CD8 alpha, CD8 |
| 33 | Immune response_HMGB1/RAGE signaling pathway                                         | 9.661E-03 | 4.684E-02 | 2 | IL-6, IL-8     |
| 34 | Th17 cells in CF                                                                     | 1.002E-02 | 4.713E-02 | 2 | IL-6, IL-8     |

**Supplementary Table 4. Comparative mRNA (Common genes) fold change between SHMT1 Knockdown and CMAS Knockdown (Kohnz et.al., 2016 PMID: 27380425)**

| <b>Gene Symbol</b> | <b>Fold Change-SHMT1 shRNA#1</b> | <b>Fold Change-SHMT1 shRNA#2</b> | <b>Fold Change-(CMAS knockdown)</b> |
|--------------------|----------------------------------|----------------------------------|-------------------------------------|
| KRT81              | -1.8                             | -1.9                             | -0.920299329                        |
| SLC2A3             | -2.6                             | -1.4                             | -0.5326393                          |
| BDNF               | -1.6                             | -1.3                             | -0.691482534                        |
| IL6                | -1.5                             | -1.3                             | -0.30881392                         |
| KANK4              | -1.5                             | -1.6                             | -0.93313234                         |
| CFI                | -1.5                             | -1.4                             | -0.81327496                         |
| ADM                | -1.5                             | -1.4                             | -0.845720677                        |
| NT5E               | -1.5                             | -1.6                             | -0.558947094                        |
| SRPX2              | -1.5                             | -1.3                             | -0.840808638                        |
| PDE4B              | -1.4                             | -1.4                             | -0.99759763                         |
| KRT17              | -1.4                             | -1.3                             | -0.726446341                        |
| CXCL8 (IL8)        | -1.3                             | -2.2                             | -0.744391055                        |
| UPP1               | -1.3                             | -1.3                             | -0.793003389                        |
| ATOH8              | 1.3                              | 1.7                              | 1.353736295                         |
| FAM83D             | 1.4                              | 1.3                              | 1.263891559                         |
| FGFR3              | 1.5                              | 1.4                              | 1.199907978                         |
| DKAKD              | 1.5                              | 1.3                              | 1.036156948                         |
| RASD1              | 1.7                              | 1.4                              | 2.45188495                          |

**Supplementary Table 5:** Primer sequences for RT-qPCR analysis; clone ID and catalog numbers for shRNAs (Open Biosystems); antibodies used; source and concentration of chemical inhibitors used- one

| Application              | Gene symbol                       | Forward primer (5'-3')                   | Reverse primer (5'-3') |
|--------------------------|-----------------------------------|------------------------------------------|------------------------|
| RT-qPCR                  | <i>SHMT1</i>                      | TCCCGAGGACTTTTGAAGA                      | TGCCACAGCACTCTGGATCT   |
|                          | <i>SHMT2</i>                      | GCTCAACCTGGCACTGACTG                     | CACTGATGTGGGCCATGTCT   |
|                          | <i>DHFR</i>                       | TGAGGGATGATGGTTGCTTG                     | TGCCTGGCTGGTTTTTCTTT   |
|                          | <i>GGH</i>                        | GCACATGCCTTGGATTTGAA                     | CGGAGAGGCTCCACTTATGG   |
|                          | <i>PUR9 (ATIC)</i>                | GTGTCCACGGAGATGCAGAG                     | AGCTTGGGCTGCAGTGTGA    |
|                          | <i>PUR2 (GART)</i>                | TTTGGTTGTGAAGGCCAGTG                     | TCCATTCCCCTGTGTTAG     |
|                          | <i>WT1</i>                        | AGCAGGAAGCACACTGGTGA                     | ACCGGGCAAACCTTTTTCTGA  |
|                          | <i>IL6</i>                        | TGTAACCGCCCCACACAGAC                     | TTCTGCCAGTGCCTCTTTGC   |
|                          | <i>IL8</i>                        | TAAAAAGCCACCGGAGCACT                     | ATCAGGAAGGCTGCCAAGAG   |
| CHIP assay               |                                   |                                          |                        |
|                          | WT1 Promoter<br><i>SHMT1</i> ChIP | GAGAAACAGGCCCTGCCC                       | GAACTTGGCGCTGGACCG     |
|                          |                                   |                                          |                        |
|                          | <b>Gene symbol</b>                | <b>Clone ID</b>                          | <b>Catalog number</b>  |
| shRNA                    | <i>SHMT1</i>                      | RHS3979-9602172                          | TRCN0000034764         |
|                          |                                   | RHS3979-9602173                          | TRCN0000034765         |
|                          | <i>SHMT2</i>                      | RHS3979-9602213                          | TRCN0000034805         |
|                          |                                   | RHS3979-9602214                          | TRCN0000034806         |
|                          | <i>DHFR</i>                       | RHS3979-9606408                          | TRCN0000039000         |
|                          |                                   | RHS3979-9606411                          | TRCN0000039003         |
|                          | <i>GGH</i>                        | RHS3979-9618537                          | TRCN0000051338         |
|                          |                                   | RHS3979-9618541                          | TRCN0000051342         |
|                          | <i>PUR9 (ATIC)</i>                | RHS3979-9602372                          | TRCN0000034964         |
|                          |                                   | RHS3979-9602375                          | TRCN0000034967         |
|                          | <i>PUR2 (GART)</i>                | RHS3979-9602315                          | TRCN0000034907         |
|                          |                                   | RHS3979-9602316                          | TRCN0000034908         |
|                          | <i>WT1</i>                        | RHS3979-9569562                          | TRCN0000001114         |
|                          |                                   | RHS3979-9569563                          | TRCN0000010596         |
|                          |                                   |                                          |                        |
| Immunoblotting<br>/ CHIP | <b>Protein symbol</b>             | <b>Antibody source</b>                   | <b>Dilution</b>        |
|                          | <i>SHMT1</i>                      | Cell signaling                           | 1:5000                 |
|                          | <i>WT1</i>                        | Cell signaling                           | 1:5000                 |
|                          | Actin                             | Cell signaling                           | 1:5000                 |
|                          | <i>IL6</i>                        | Santa cruz                               | 1:500                  |
|                          | <i>IL8</i>                        | Santa cruz                               | 1:500                  |
|                          |                                   |                                          |                        |
|                          | <b>Compounds</b>                  | <b>Concentration</b>                     | <b>Source</b>          |
|                          | P-3Fax-<br>Neu5Ac                 | Different concentrations as<br>indicated | Tocris                 |
|                          | Neu5Ac                            | Different concentrations as<br>indicated | Santa Cruz             |
